# Supplementary material for: Plasmonic Metasensors Based on 2D Hybrid Atomically Thin Perovskite Nanomaterials
Source: PubMed Central journal article supplement (PMC7407500; doi:10.3390/nano10071289), 2020-06-30
Supplement: nanomaterials-10-01289-s001.pdf [file nanomaterials-10-01289-s001.pdf]

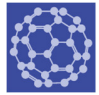

1 Article

## 2 Plasmonic Metasensors based on 2D hybrid 3 atomically thin perovskite nanomaterials

4 Shuwen Zeng<sup>1,2\*†</sup>, Guozhen Liang<sup>2†</sup>, Alexandre Gheno<sup>1</sup>, Sylvain Vedraïne<sup>1</sup>, Bernard Ratier<sup>1</sup>,  
5 Ho-Pui Ho<sup>3</sup>, Nanfang Yu<sup>2\*</sup>

6 <sup>1</sup> XLIM Research Institute, UMR 7252 CNRS/University of Limoges, 123 Avenue Albert Thomas, Limoges,  
7 France;

8 <sup>2</sup> Department of Applied Physics and Applied Mathematics, Columbia University, New York, USA

9 <sup>3</sup> Department of Biomedical Engineering, The Chinese University of Hong Kong, Shatin, N.T., Hong Kong;

10 † These authors contributed equally to this work.

11 \* Correspondence: [shuwen.zeng@unilim.fr](mailto:shuwen.zeng@unilim.fr) (S.Z.), [ny2214@columbia.edu](mailto:ny2214@columbia.edu) (N.Y.)

12 Received: date; Accepted: date; Published: date

13

14

15

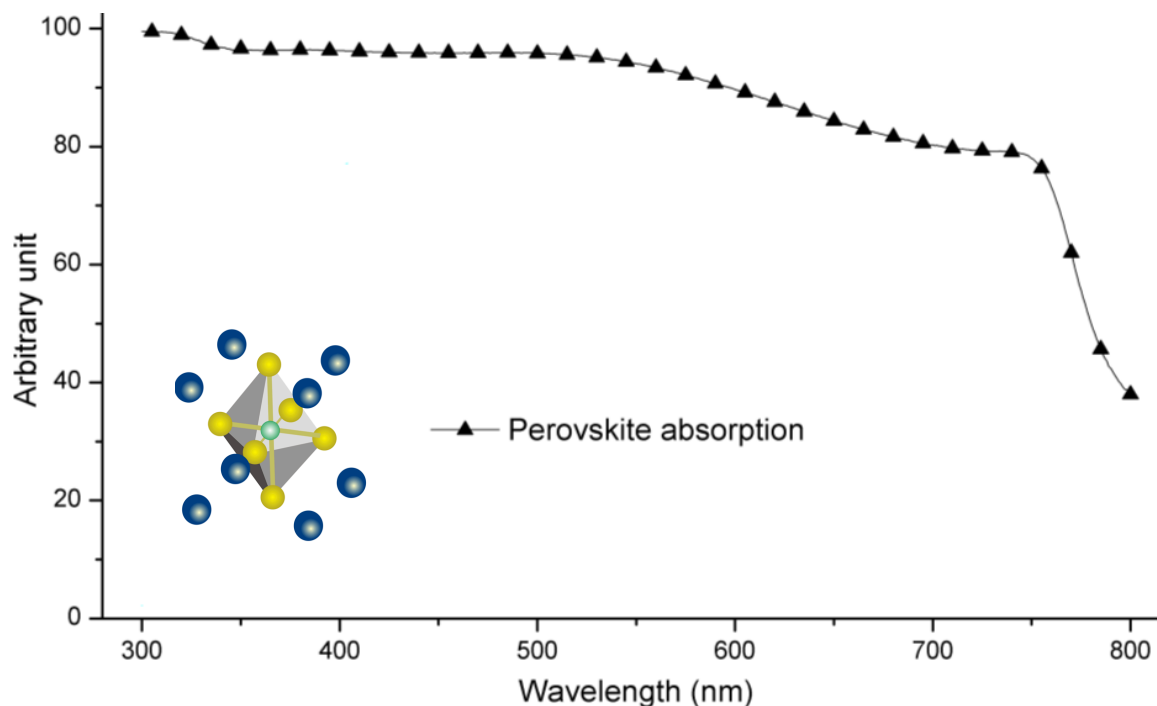

16

17

18 **Figure S1.** Experimental measurement results showing the broad absorption spectra of  $\text{CH}_3\text{NH}_3\text{PbI}_3$  (MAPbI<sub>3</sub>)  
19 perovskites.

20

21

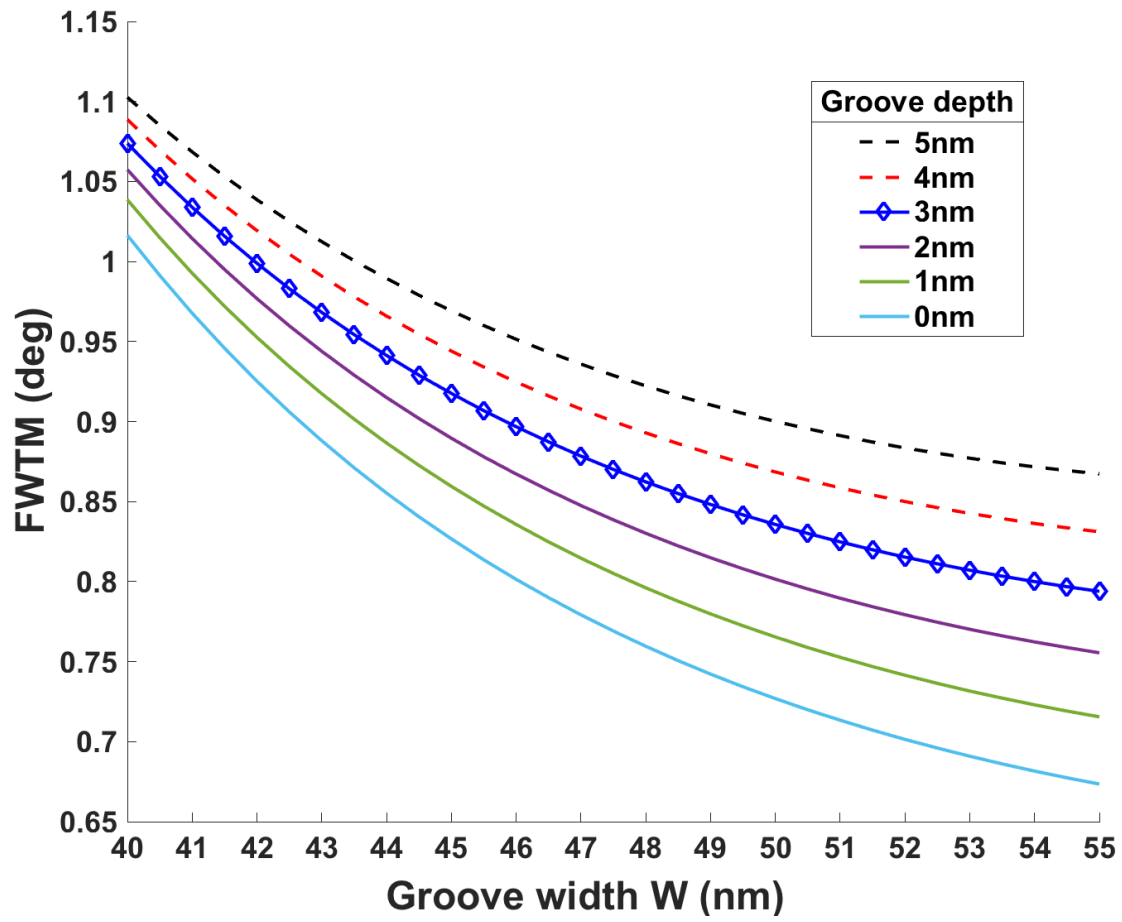

22

23

24

Figure S2. SPR curve widths tuned by the groove depth of 2D Perovskite-based metasurface structure.

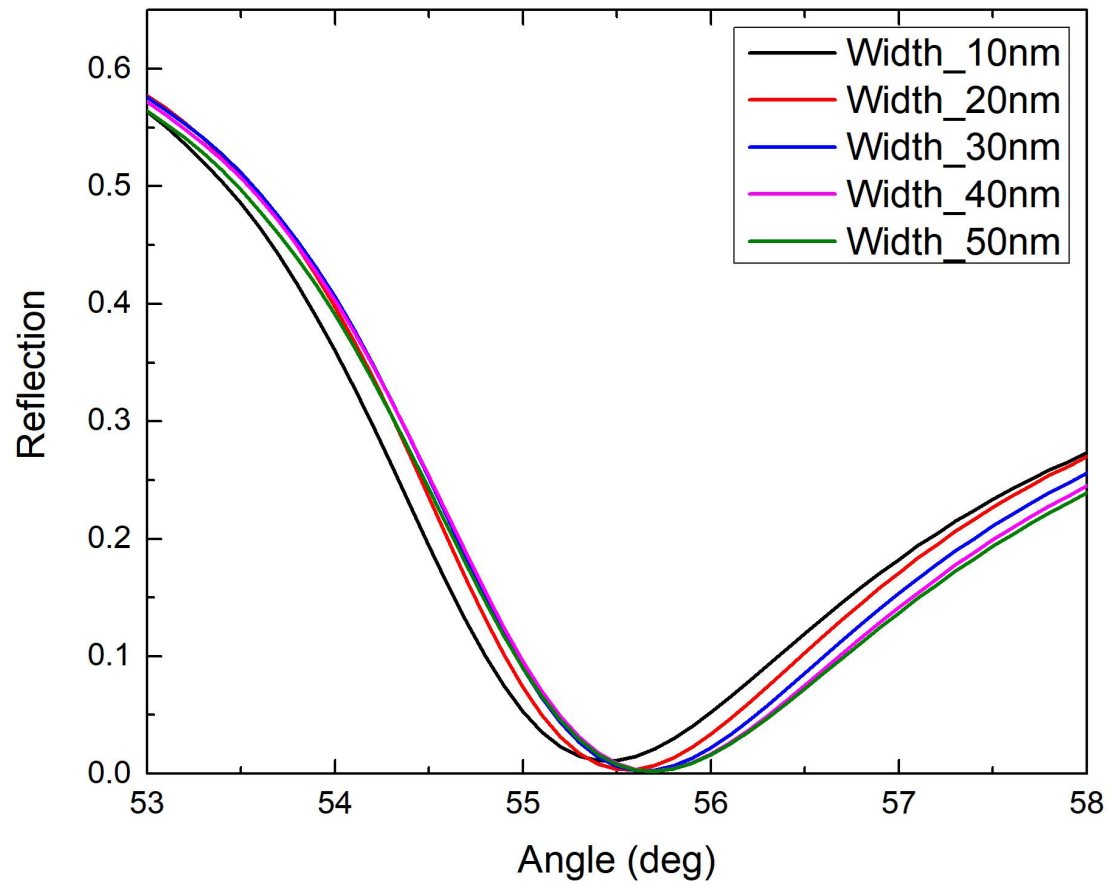

25

26

**Figure S3.** SPR curves with Reflectivity tuned by the groove width of the metasurface structure with 2D perovskite layers, corresponding to the zoom-in Figure 10b.

27

28

29

30

31

32

33

34

35

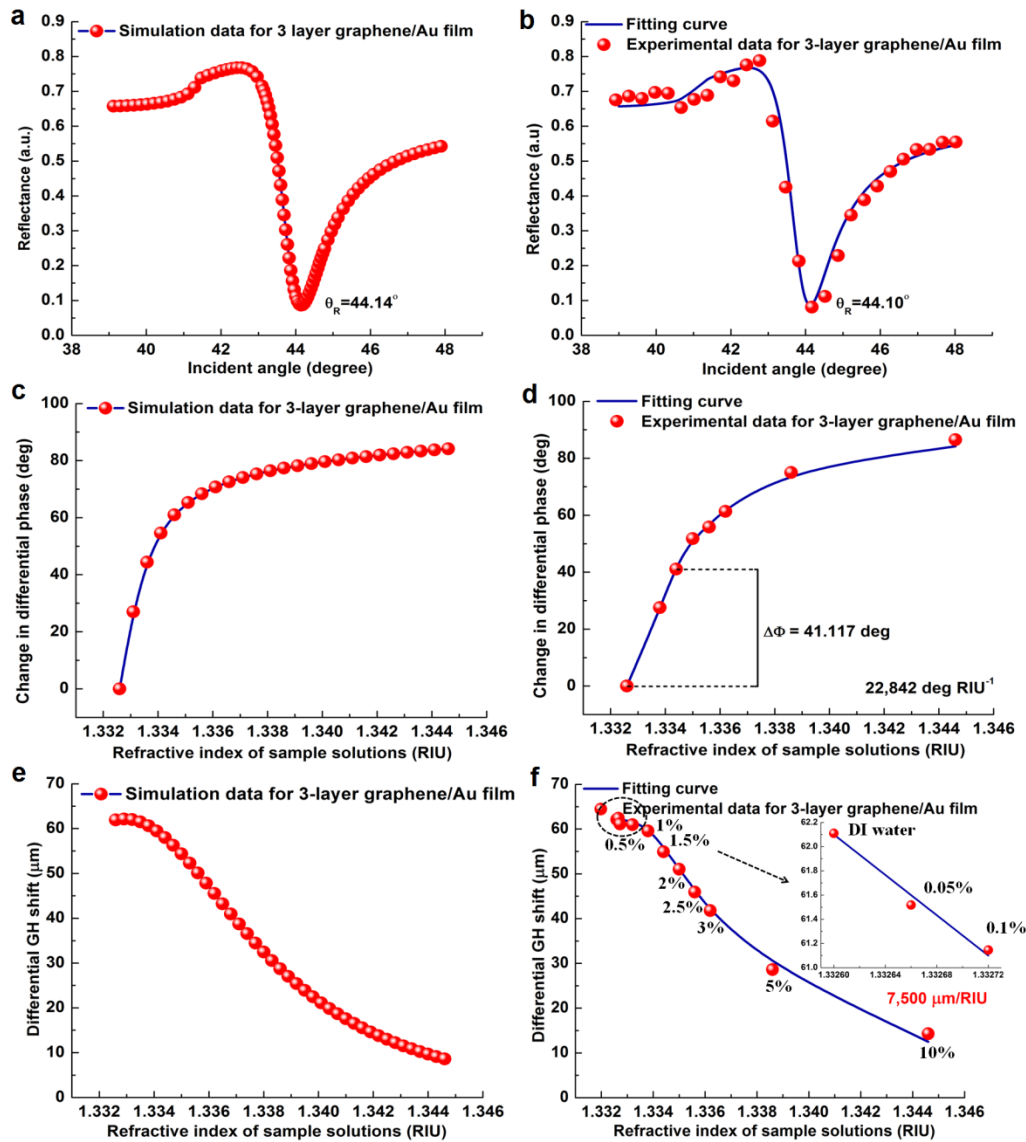

36

37

38

39

40

41

42

**Figure S4.** Experimental and simulation results based on three-layer graphene/gold metasurfaces. Theoretical curves of a) reflectance with respect to various incident angles in the air, c) differential phase and e) differential GH shift between p-polarized light and s-polarized light of glycerol solutions with different concentrations. Experimental curves of b) reflectance, d) differential phase and f) differential GH shift. The resonance angle is  $44.10^\circ$  in good agreement with the theoretical one. The phase and GH shift shows high sensitivity as  $22,842 \text{ deg/RIU}$  and  $7,500 \mu\text{m/RIU}$  respectively.

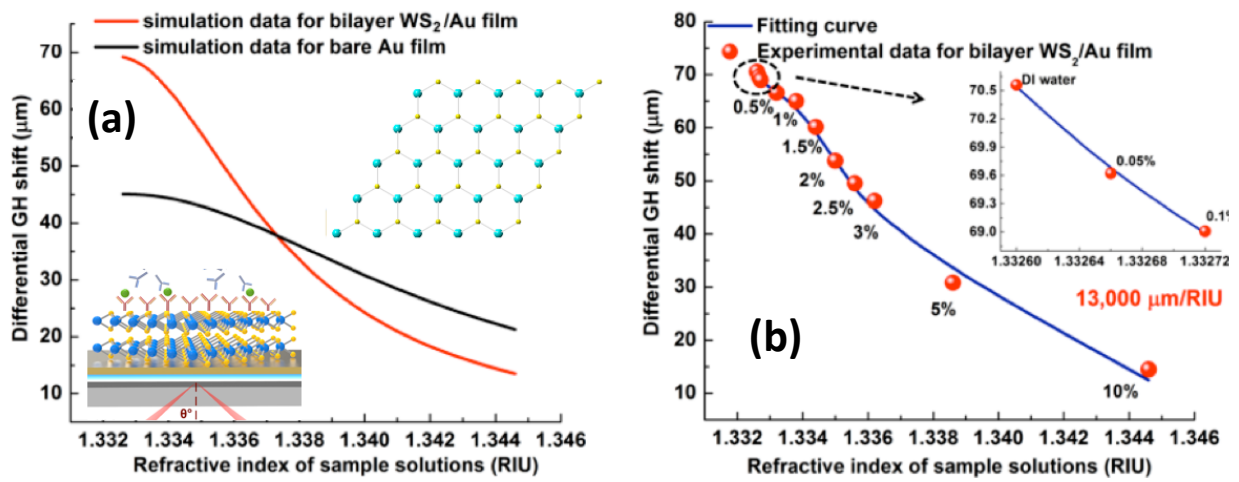

43  
44  
45  
46  
47

Figure S5. (a) and (b) Experimental and simulation data, respectively, of GH shift in a device based on a bilayer  $WS_2$ .

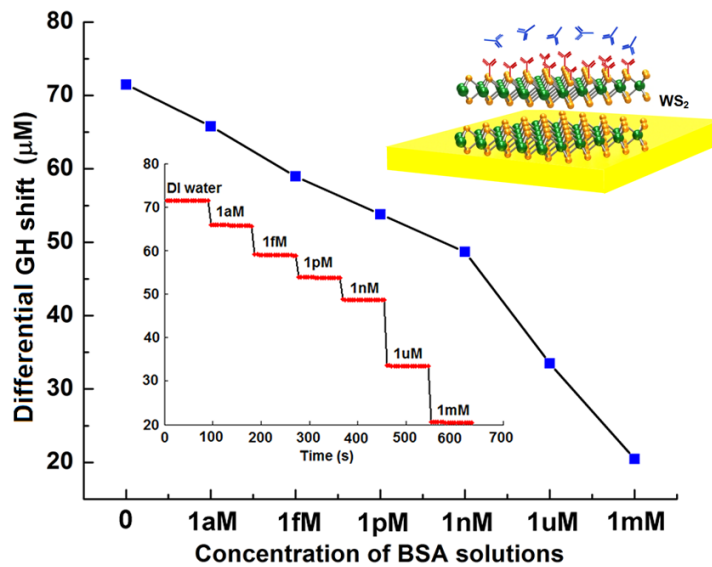

48  
49  
50  
51  
52

Figure S6. The averaged GH shift of BSA molecules with molar concentration from 1aM to 1mM based on bilayer  $WS_2$ /gold metasurfaces. The insert curve gives the binding trace of BSA molecules during a short time.
