# Supplementary material for: Plasmonic Metasensors Based on 2D Hybrid Atomically Thin Perovskite Nanomaterials
Source: MDPI journal article supplement (doi:10.3390/nano10071289), 2020-06-30
Supplement: s1 [file s1]

# Plasmonic Metasensors based on 2D hybrid atomically thin perovskite nanomaterials

Shuwen Zeng<sup>1,2\*</sup>, Guozhen Liang<sup>2†</sup>, Alexandre Gheno<sup>1</sup>, Sylvain Vedraine<sup>1</sup>, Bernard Ratier<sup>1</sup>, Ho-Pui Ho<sup>3</sup>, Nanfang Yu<sup>2\*</sup>

<sup>1</sup> XLIM Research Institute, UMR 7252 CNRS/University of Limoges, 123 Avenue Albert Thomas, Limoges, France;

<sup>2</sup> Department of Applied Physics and Applied Mathematics, Columbia University, New York, USA

<sup>3</sup> Department of Biomedical Engineering, The Chinese University of Hong Kong, Shatin, N.T., Hong Kong;

<sup>†</sup> These authors contributed equally to this work.

\* Correspondence: [shuwen.zeng@unilim.fr](mailto:shuwen.zeng@unilim.fr) (S.Z.), [ny2214@columbia.edu](mailto:ny2214@columbia.edu) (N.Y.)

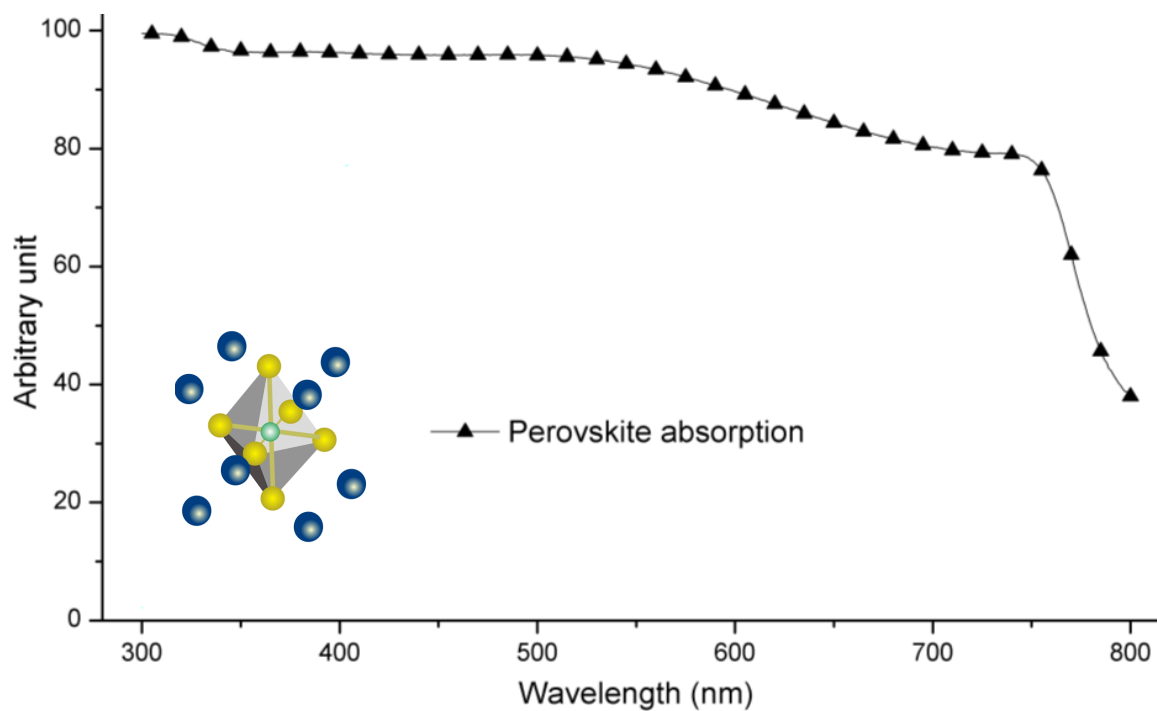

**Figure S1.** Experimental measurement results showing the broad absorption spectra of CH<sub>3</sub>NH<sub>3</sub>PbI<sub>3</sub> (MAPbI<sub>3</sub>) perovskites.

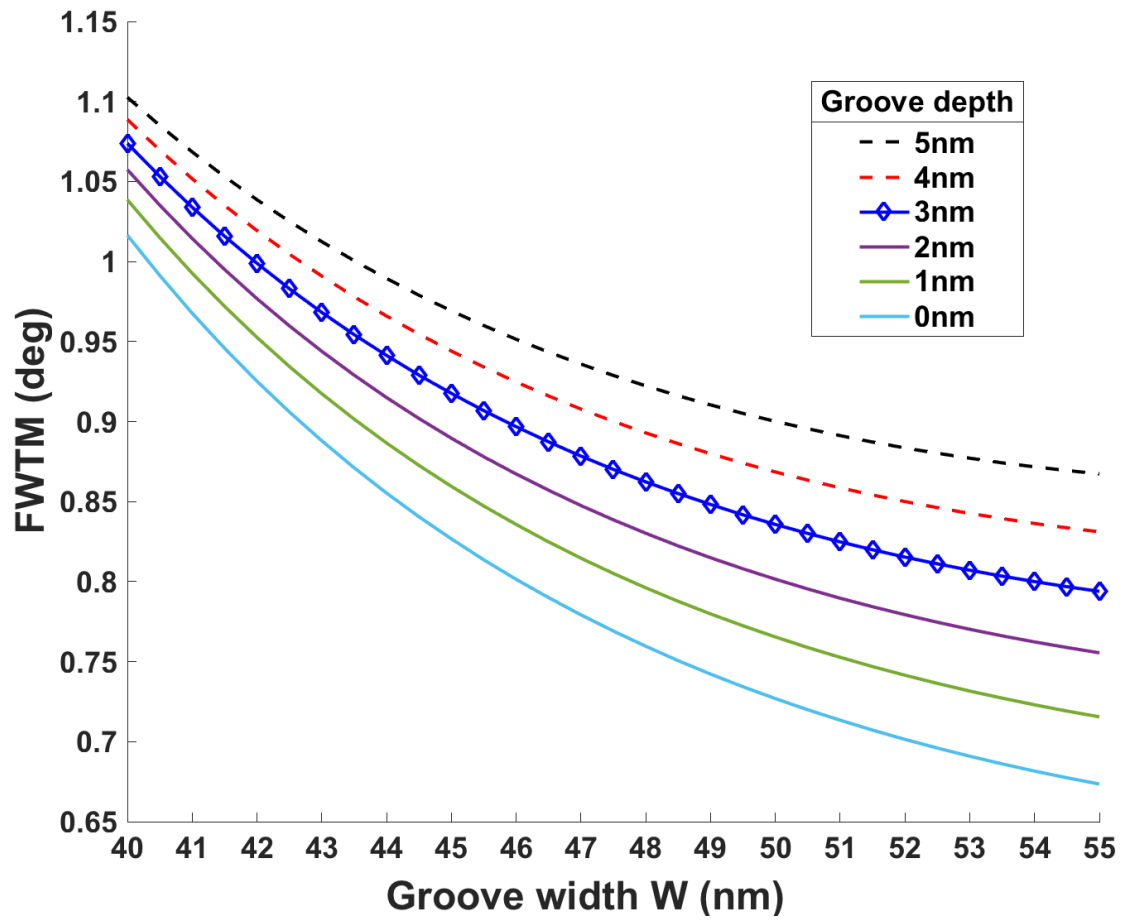

**Figure S2.** SPR curve widths tuned by the groove depth of 2D Perovskite-based metasurface structure.

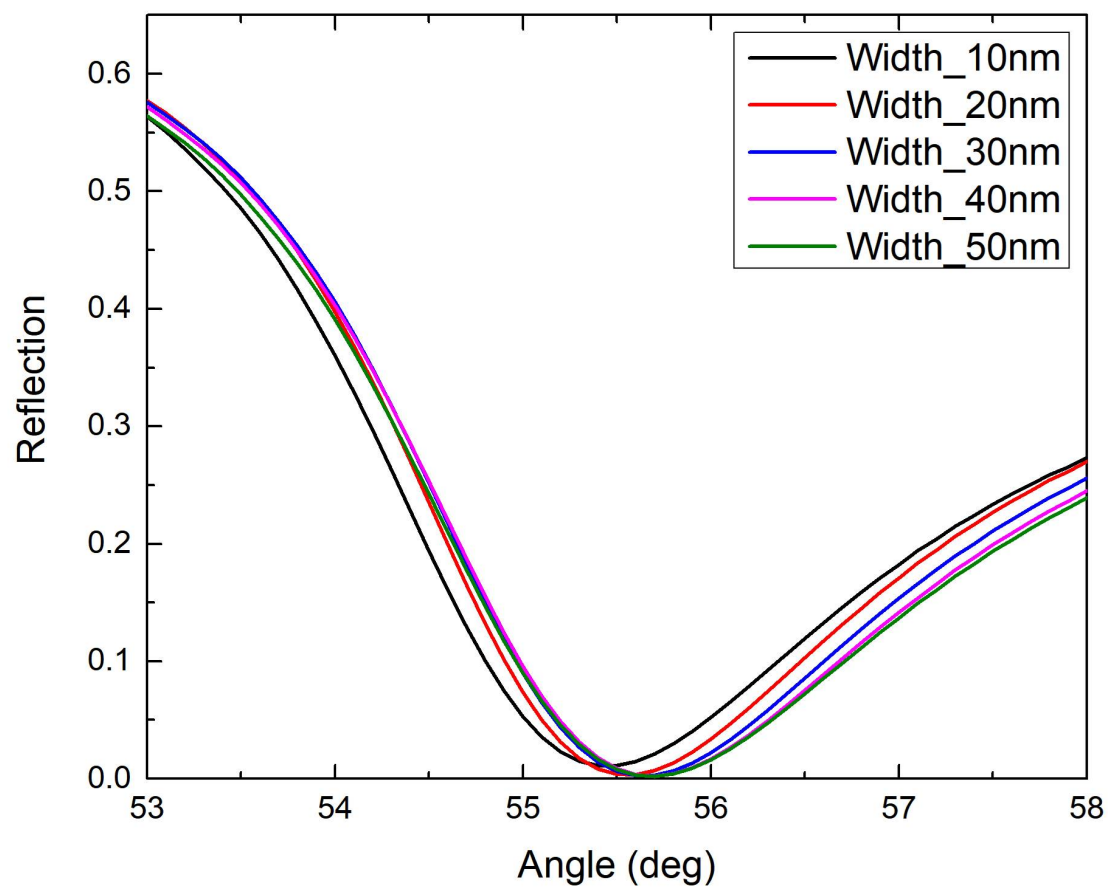

**Figure S3.** SPR curves with Reflectivity tuned by the groove width of the metasurface structure with 2D perovskite layers, corresponding to the zoom-in Figure 10b.

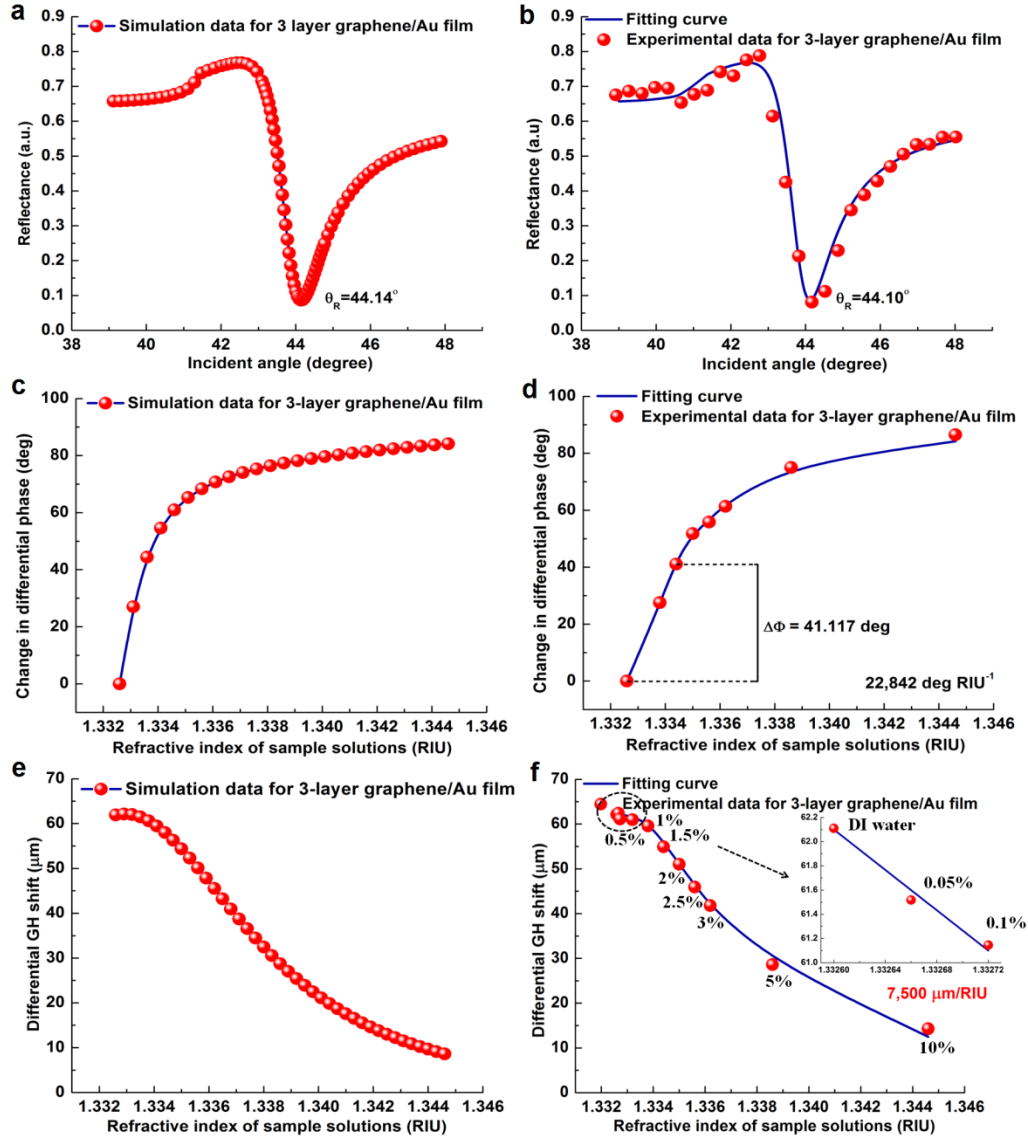

**Figure S4.** Experimental and simulation results based on three-layer graphene/gold metasurfaces. Theoretical curves of a) reflectance with respect to various incident angles in the air, c) differential phase and e) differential GH shift between p-polarized light and s-polarized light of glycerol solutions with different concentrations. Experimental curves of b) reflectance, d) differential phase and f) differential GH shift. The resonance angle is  $44.10^\circ$  in good agreement with the theoretical one. The phase and GH shift shows high sensitivity as  $22,842 \text{ deg/RIU}$  and  $7,500 \mu\text{m/RIU}$  respectively.

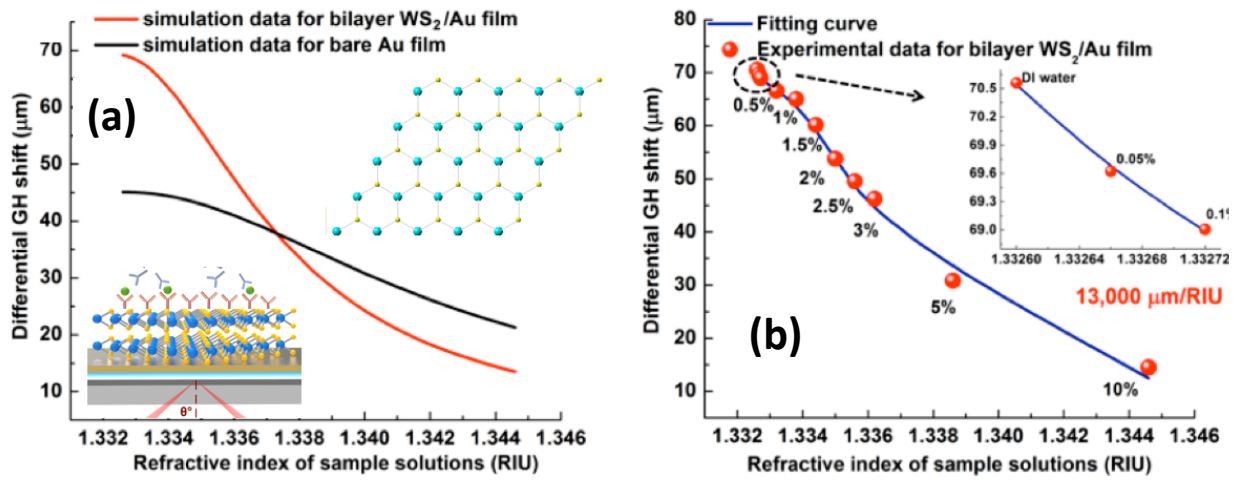

**Figure S5.** (a) and (b) Experimental and simulation data, respectively, of GH shift in a device based on a bilayer  $\text{WS}_2$ .

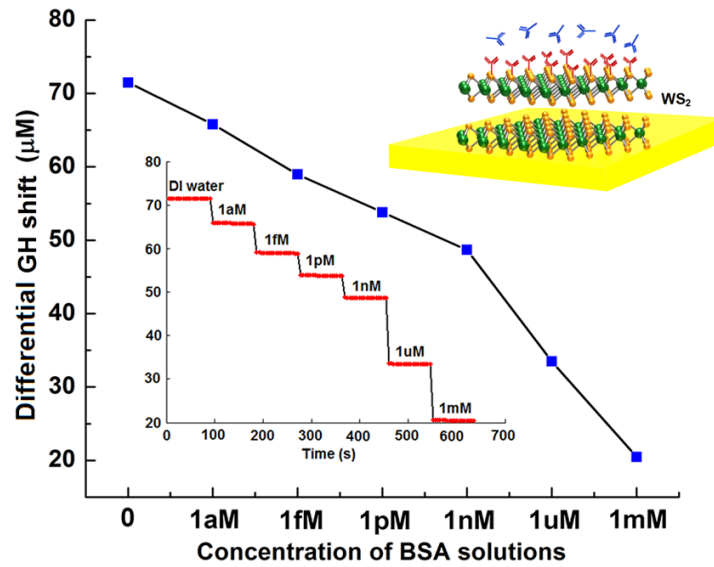

**Figure S6.** The averaged GH shift of BSA molecules with molar concentration from 1aM to 1mM based on bilayer  $\text{WS}_2/\text{gold}$  metasurfaces. The insert curve gives the binding trace of BSA molecules during a short time.
